# Supplementary material for: Bioaerosol Sampling Devices and Pretreatment for Bacterial Characterization: Theoretical Differences and a Field Experience in a Wastewater Treatment Plant
Source: MDPI journal article supplement (doi:10.3390/microorganisms12050965), 2024-05-10
Supplement: s1 [file s1]

a)

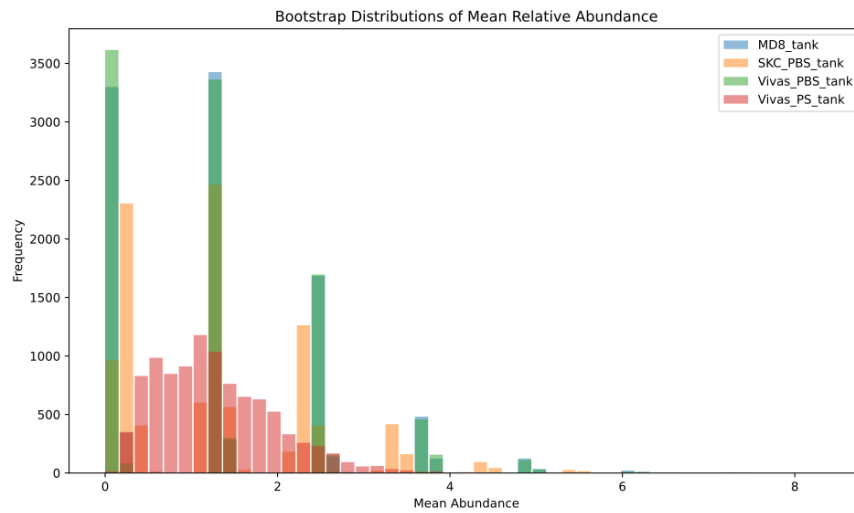

b)

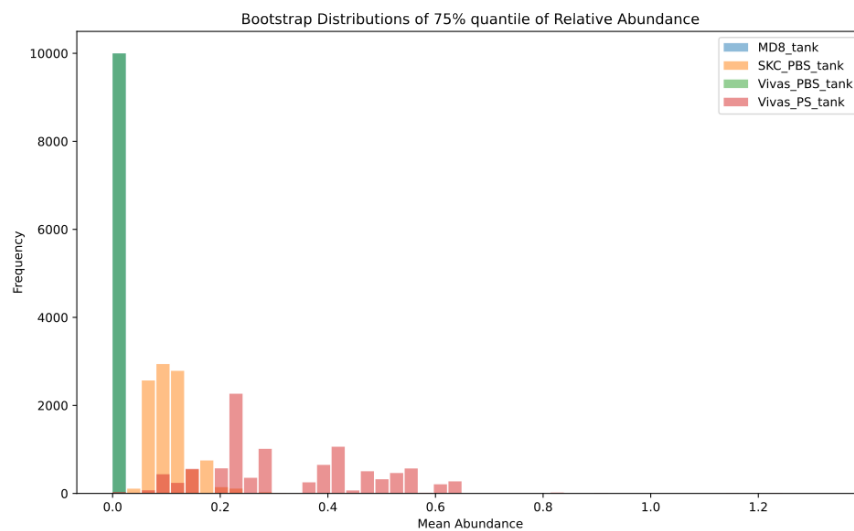

c)

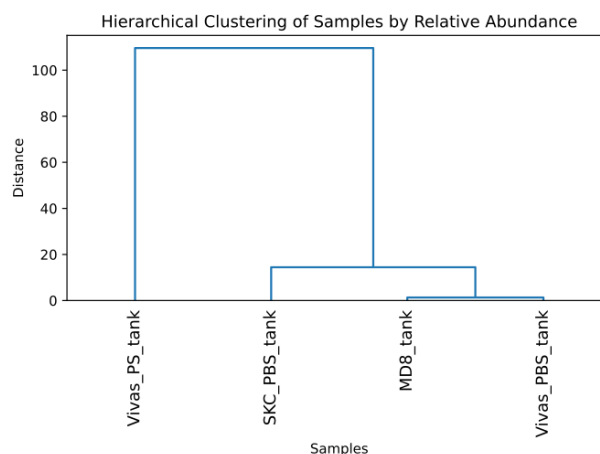

**Supplementary Figure S1:** Analysis of the differences between samples via bootstrap ( $n = 10000$ ) distribution of mean (a) relative abundance and upper quartile (75th percentile, b) of the same value. Both figures show a much more even distribution for sample Vivas PS tank, highlighting the significantly higher genus diversity compared to the other samples. Panel (c) shows the dendrogram relative to hierarchical clustering of relative abundance, based on complete linkage of Euclidean pairwise distances. The air samples collected using the Airport MD8 has as sample ID: “MD8\_tank”. The air sample collected using the BioSampler has as sample ID: “SKC\_PBS\_tank”. The air samples collected using the BioSpot-VIVAS have as sample ID: “Vivas\_PBS\_tank” (sampled using the PBS as collection media) and “Vivas\_PS\_tank” (sampled using the preserving solution of nucleic acids DNA/RNA shield™ as collection media).

**Supplementary Table S1:** Recent studies on non culturable and culturable bacteria characterization by 16S rRNA gene sequencing on bioaerosol from WWTPs.

| Paper                                                                                                                                                                                                                                                                                                                             | Sampler                                                | Volume per sample                                                                        | Location                                            | Quantitative results                                                                                                                                              | Qualitative results (predominant genera)                                                                                                                                                                                                                                                                                                                     |
|-----------------------------------------------------------------------------------------------------------------------------------------------------------------------------------------------------------------------------------------------------------------------------------------------------------------------------------|--------------------------------------------------------|------------------------------------------------------------------------------------------|-----------------------------------------------------|-------------------------------------------------------------------------------------------------------------------------------------------------------------------|--------------------------------------------------------------------------------------------------------------------------------------------------------------------------------------------------------------------------------------------------------------------------------------------------------------------------------------------------------------|
| Hubad, B., & Lapanje, A. (2013). The efficient method for simultaneous monitoring of the culturable as well as nonculturable airborne microorganisms. <i>PloS one</i> , 8(12), e82186. <a href="https://doi.org/10.1371/journal.pone.0082186">https://doi.org/10.1371/journal.pone.0082186</a>                                    | RCS High Flow air samplers (Biotest, Germany). 100 lpm | 2000 L Impaction holders for culture independent analysis/ 500 L for culturable bacteria | WWTP and alpine site in Slovenia                    | Bioaerosol @ WWTP: 800-2300 CFU/m <sup>3</sup> -16S Gene 4x10 <sup>7</sup> :9x10 <sup>8</sup> Copy numbers/m <sup>3</sup> - Alpine site 47-145 CFU/m <sup>3</sup> | High ratio between unculturable and culturable bacteria. Molecular methods highlight pathogens (e.g. <i>Streptococcus pneumoniae</i> ) or opportunistic pathogens (e.g. <i>Mycobacterium avium</i> ) absent from culturable bacteria. Method was applied to quantify and to determine diversity of bacteria in air from the WWTP and from alpine environment |
| Kowalski, M., Wolany, J., Pastuszka, J.S. et al. (2017). Characteristics of airborne bacteria and fungi in some Polish wastewater treatment plants. <i>Int. J. Environ. Sci. Technol.</i> , 14, 2181–2192. <a href="https://doi.org/10.1007/s13762-017-1314-2">https://doi.org/10.1007/s13762-017-1314-2</a>                      | Six-stage Andersen impactor                            | 226,4 L                                                                                  | 5 WWTPs in Poland                                   | airborne bacteria and fungi ranged from 10 <sup>2</sup> to 10 <sup>3</sup> CFU/m <sup>3</sup>                                                                     | The Gram-positive cocci and nonsporing Gram-positive rods were the dominating forms - most antibiotic- resistant features were present among <i>Bacillus</i> species (especially <i>Bacillus mycoides</i> )                                                                                                                                                  |
| Han, Y., Yang, K., Yang, T., Zhang, M., & Li, L. (2019). Bioaerosols emission and exposure risk of a wastewater treatment plant with A2O treatment process. <i>Ecotoxicology and environmental safety</i> , 169, 161–168. <a href="https://doi.org/10.1016/j.ecoenv.2018.11.018">https://doi.org/10.1016/j.ecoenv.2018.11.018</a> | Six Stage Viable Andersen Cascade Impactor             | 84,90 L                                                                                  | Anaerobic-anoxic-oxic (A2O) process, Beijing, China | 1.00×10 <sup>4</sup> CFU/m <sup>3</sup> , summer max                                                                                                              | 18 of the 65 species of bacteria detected potentially or opportunistically pathogenic, such as <i>Chryseobacterium</i> , <i>Stenotrophomonas</i> , <i>Alcaligenes</i> , <i>Micrococcus</i> , <i>Pantoea</i> , <i>Enterobacter</i> and <i>Escherichia-Shigella</i>                                                                                            |
| Gaviria-Figueroa, A., Preisner, E. C., Hoque, S., Feigley, C. E., & Norman, R. S. (2019). Emission and dispersal of antibiotic resistance genes through bioaerosols generated during the                                                                                                                                          | PTFE filter (culture independent analysis); Airport    | 5040 L for culture-independent analysis.                                                 | WWTP along the coast of South Carolina              | logarithm of the antibiotic resistant gene copies per ng                                                                                                          | <i>Zoogloea</i> , <i>Thauera</i> , <i>Azospira</i> , <i>Dechloromonas</i> , <i>Chitinivorax</i> , <i>Candidatus Accumulibacter</i> , <i>Rhodobacter</i> , <i>Alkanindiges</i>                                                                                                                                                                                |

|                                                                                                                                                                                                                                                                                                                                                 |                                                                                                                                                               |                                                                           |                                   |                                                 |                                                                                                                                                     |
|-------------------------------------------------------------------------------------------------------------------------------------------------------------------------------------------------------------------------------------------------------------------------------------------------------------------------------------------------|---------------------------------------------------------------------------------------------------------------------------------------------------------------|---------------------------------------------------------------------------|-----------------------------------|-------------------------------------------------|-----------------------------------------------------------------------------------------------------------------------------------------------------|
| treatment of municipal sewage. <i>The Science of the total environment</i> , 686, 402–412. <a href="https://doi.org/10.1016/j.scitotenv.2019.05.454">https://doi.org/10.1016/j.scitotenv.2019.05.454</a>                                                                                                                                        | MD8 (culture dependent analysis)                                                                                                                              | 3750 L for culture-dependent microbial community and ARG analysis         |                                   | of DNA (amount of DNA?)                         | <i>Acinetobacter</i> , <i>Candidatus Competibacter</i> , <i>Flavobacterium</i> , <i>Ferruginibacter</i> , <i>Leadbetterella</i> , <i>Nitrospira</i> |
| Wan, J.; Zhang, Z.; Huo, Y.; Wang, X.; Wang, Y.; Wu, J.; Huo, M. Particle Size Matters: Distribution, Source, and Seasonality Characteristics of Airborne and Pathogenic Bacteria in Wastewater Treatment Plants (2023). <i>Atmosphere</i> , 14, 465. <a href="https://doi.org/10.3390/atmos14030465">https://doi.org/10.3390/atmos14030465</a> | Eight-stage Andersen impactor                                                                                                                                 | 13.584 L (culture independent analysis)                                   | 2 WWTP in Changchun, China        | 92 to 1793 ASV per sample                       | Bacillales, Mycobacterium, and Pseudomonas in winter; Brevundimonas in autumn; and Acinetobacter, Comamonas, and Ralstonia in summer.               |
| Yang, T., Han, Y., Liu, J., & Li, L. (2019). Aerosols from a wastewater treatment plant using oxidation ditch process: Characteristics, source apportionment, and exposure risks. <i>Environmental pollution</i> , 250, 627–638. <a href="https://doi.org/10.1016/j.envpol.2019.04.071">https://doi.org/10.1016/j.envpol.2019.04.071</a>        | TSP 100 L/min over a period of 4 h for culture independent analysis; Six-stages Andersen impactors 2 min at a flow rate of 28.3 L/min for culturable bacteria | 24000 L per culture independent analysis / 56,6 L per culturable bacteria | WWTP Hefei, China                 | Up to 3807 CFU/m <sup>3</sup>                   | Geothrix, Microthrix, Cyanobacteria, Saprospiraceae, Chroococcidiopsis (among pathogenic b.:Rhodococcus, Mycobacterium and Arcobacter)              |
| This paper                                                                                                                                                                                                                                                                                                                                      | Airport MD8; SKC Biosampler; BioSpot ViVAS                                                                                                                    | 1440 L (culture independent analysis)                                     | WWTP Trieste (Italy) - this study | Bioaerosol: 16 101 of trimmed reads and 64 OTUs | Biospot Vivas_PS: Klebsiella, Enterobacter, Pseudomonas, and Acinetobacter; SKC Biosampler and Airport MD8: Stenotrophomonas                        |

**Supplementary Table S2:** Number of trimmed reads used for each sample.

|                           | sample         | Sampling      | number of trimmed reads |
|---------------------------|----------------|---------------|-------------------------|
| <b>bioaerosol samples</b> | SKC_PBS_tank   | BioSampler    | 3375                    |
|                           | Vivas_PBS_tank | BioSpot-VIVAS | 4471                    |
|                           | Vivas_PS_tank  | BioSpot-VIVAS | 5096                    |
|                           | MD8_tank       | Airport MD8   | 3159                    |
| <b>wastewater samples</b> | Water_1        | Grab          | 6075                    |
|                           | Water_2        | Grab          | 6917                    |
|                           | Water_24h_1    | Composite     | 5650                    |
|                           | Water_3        | Grab          | 7407                    |
|                           | Water_24h_2    | Composite     | 7456                    |
|                           | Water_4        | Grab          | 10750                   |
|                           | Water_24h_3    | Composite     | 6139                    |
|                           | Water_5        | Grab          | 5544                    |
|                           | Water_24h_4    | Composite     | 6180                    |
|                           | Water_6        | Grab          | 5523                    |
|                           | Water_7        | Grab          | 2446                    |
