# Supplementary material for: Bioaerosol Sampling Devices and Pretreatment for Bacterial Characterization: Theoretical Differences and a Field Experience in a Wastewater Treatment Plant
Source: Microorganisms. 2024 May 10;12(5):965. doi: 10.3390/microorganisms12050965 (PMC11124041; doi:10.3390/microorganisms12050965)
Supplement: Supplementary file 1 [file microorganisms-12-00965-s001.zip › Table S3.xlsx]

## Sheet: Foglio1
	ID	Genus (Aggregated)	Genus	Taxonomy	Combined Abundance	Water_24h_1 Abundance	Water_24h_2 Abundance	Water_24h_3 Abundance	Water_24h_4 Abundance	Water_1 Abundance	Water_2 Abundance	Water_3 Abundance	Water_4 Abundance	Water_5 Abundance	Water_6 Abundance	Water_7 Abundance	MD8_tank Abundance	SKC_PBS_tank Abundance	Vivas_PBS_tank Abundance	Vivas_PS_tank Abundance
0	Corynebacterium	Corynebacterium	Corynebacterium	Bacteria; Actinobacteriota; Actinobacteria; Corynebacteriales; Corynebacteriaceae; Corynebacterium	155	0	0	0	0	0	0	1	0	0	1	0	0	0	1	60
1	Bacteroides	Bacteroides	Bacteroides	Bacteria; Bacteroidota; Bacteroidia; Bacteroidales; Bacteroidaceae; Bacteroides	3077	178	209	172	133	427	222	563	510	207	308	140	0	7	1	0
2	Barnesiella	Barnesiella	Barnesiella	Bacteria; Bacteroidota; Bacteroidia; Bacteroidales; Barnesiellaceae; Barnesiella	107	6	9	9	11	25	8	14	14	4	6	0	0	0	0	0
3	Paludibacter	Paludibacter	Paludibacter	Bacteria; Bacteroidota; Bacteroidia; Bacteroidales; Paludibacteraceae; Paludibacter	359	24	27	16	25	11	35	47	50	34	40	27	0	1	0	4
4	Prevotella_9	Prevotella_9	Prevotella_9	Bacteria; Bacteroidota; Bacteroidia; Bacteroidales; Prevotellaceae; Prevotella_9	194	12	11	8	5	42	10	32	30	15	20	7	0	1	0	1
5	Alistipes	Alistipes	Alistipes	Bacteria; Bacteroidota; Bacteroidia; Bacteroidales; Rikenellaceae; Alistipes	451	40	26	23	25	99	36	65	68	26	25	16	1	1	0	0
6	DMER64	DMER64	Other	Bacteria; Bacteroidota; Bacteroidia; Bacteroidales; Rikenellaceae; DMER64	118	26	3	13	3	0	3	32	0	15	18	5	0	0	0	0
7	Macellibacteroides	Macellibacteroides	Macellibacteroides	Bacteria; Bacteroidota; Bacteroidia; Bacteroidales; Tannerellaceae; Macellibacteroides	263	3	17	21	23	11	27	32	32	27	43	19	0	1	1	6
8	Parabacteroides	Parabacteroides	Parabacteroides	Bacteria; Bacteroidota; Bacteroidia; Bacteroidales; Tannerellaceae; Parabacteroides	461	25	28	43	25	57	39	66	80	32	46	20	0	0	0	0
11	Flavobacterium	Flavobacterium	Flavobacterium	Bacteria; Bacteroidota; Bacteroidia; Flavobacteriales; Flavobacteriaceae; Flavobacterium	1688	102	174	96	79	74	174	181	299	132	107	41	0	18	1	28
12	Lutibacter	Lutibacter	Lutibacter	Bacteria; Bacteroidota; Bacteroidia; Flavobacteriales; Flavobacteriaceae; Lutibacter	188	17	32	22	15	6	38	24	19	5	2	2	0	0	0	6
13	Chryseobacterium	Chryseobacterium	Chryseobacterium	Bacteria; Bacteroidota; Bacteroidia; Flavobacteriales; Weeksellaceae; Chryseobacterium	110	9	6	5	10	8	11	11	15	13	11	9	0	2	0	0
15	Uncultured-25	Uncultured-25	Other	Bacteria; Bdellovibrionota; Oligoflexia; Oligoflexales; Oligoflexaceae; Uncultured	100	0	0	0	0	0	0	0	1	0	0	0	0	0	0	0
16	{Unknown Genus} Arcobacteraceae	{Unknown Genus} Arcobacteraceae	Other	Bacteria; Campylobacterota; Campylobacteria; Campylobacterales; Arcobacteraceae;	401	39	30	34	30	22	40	41	67	33	42	17	0	2	0	3
17	Arcobacter	Arcobacter	Arcobacter	Bacteria; Campylobacterota; Campylobacteria; Campylobacterales; Arcobacteraceae; Arcobacter	10906	752	971	763	778	862	807	1005	2246	931	1189	533	2	27	2	24
18	Pseudarcobacter	Pseudarcobacter	Pseudarcobacter	Bacteria; Campylobacterota; Campylobacteria; Campylobacterales; Arcobacteraceae; Pseudarcobacter	3305	325	250	183	208	294	492	365	470	311	227	104	0	7	0	68
19	Uncultured-26	Uncultured-26	Other	Bacteria; Campylobacterota; Campylobacteria; Campylobacterales; Arcobacteraceae; Uncultured	8543	1180	1308	922	767	460	1527	665	1033	236	338	94	2	5	1	0
20	Sulfurimonas	Sulfurimonas	Sulfurimonas	Bacteria; Campylobacterota; Campylobacteria; Campylobacterales; Sulfurimonadaceae; Sulfurimonas	140	12	16	9	12	10	30	15	19	2	9	6	0	0	0	0
21	Sulfurospirillum	Sulfurospirillum	Sulfurospirillum	Bacteria; Campylobacterota; Campylobacteria; Campylobacterales; Sulfurospirillaceae; Sulfurospirillum	196	17	13	16	18	17	31	26	27	10	11	9	0	0	1	0
22	Sulfurovum	Sulfurovum	Sulfurovum	Bacteria; Campylobacterota; Campylobacteria; Campylobacterales; Sulfurovaceae; Sulfurovum	127	11	19	16	13	4	26	13	13	6	5	1	0	0	0	0
23	W5	W5	Other	Bacteria; Cloacimonadota; Cloacimonadia; Cloacimonadales; Cloacimonadaceae; W5	347	58	8	51	32	0	8	55	0	49	58	28	0	0	0	0
24	Trichococcus	Trichococcus	Trichococcus	Bacteria; Firmicutes; Bacilli; Lactobacillales; Carnobacteriaceae; Trichococcus	700	90	81	37	30	73	134	95	78	39	20	17	0	5	0	0
25	Lactococcus	Lactococcus	Lactococcus	Bacteria; Firmicutes; Bacilli; Lactobacillales; Streptococcaceae; Lactococcus	136	7	5	9	13	5	6	16	23	10	11	6	0	1	0	24
26	Streptococcus	Streptococcus	Streptococcus	Bacteria; Firmicutes; Bacilli; Lactobacillales; Streptococcaceae; Streptococcus	139	5	14	4	2	16	13	11	20	4	7	4	0	1	0	22
27	Staphylococcus	Staphylococcus	Staphylococcus	Bacteria; Firmicutes; Bacilli; Staphylococcales; Staphylococcaceae; Staphylococcus	546	0	1	0	0	0	0	0	0	0	0	0	0	0	0	13
28	Christensenellaceae R-7 group	Christensenellaceae R-7 group	Other	Bacteria; Firmicutes; Clostridia; Christensenellales; Christensenellaceae; Christensenellaceae R-7 group	135	10	10	15	6	29	10	18	18	4	9	5	0	1	0	0
29	{Unknown Family} Clostridia UCG-014	{Unknown Family} Clostridia UCG-014	Other	Bacteria; Firmicutes; Clostridia; Clostridia UCG-014; ;	159	9	10	10	7	25	10	24	26	9	7	8	0	1	3	10
30	[Eubacterium] eligens group	[Eubacterium] eligens group	Eubacterium	Bacteria; Firmicutes; Clostridia; Lachnospirales; Lachnospiraceae; [Eubacterium] eligens group	165	12	9	11	6	35	6	30	25	7	12	11	0	1	0	0
31	[Eubacterium] oxidoreducens group	[Eubacterium] oxidoreducens group	Eubacterium	Bacteria; Firmicutes; Clostridia; Lachnospirales; Lachnospiraceae; [Eubacterium] oxidoreducens group	170	0	0	0	0	0	1	2	0	0	0	0	0	0	0	0
32	[Ruminococcus] torques group	[Ruminococcus] torques group	Ruminococcus	Bacteria; Firmicutes; Clostridia; Lachnospirales; Lachnospiraceae; [Ruminococcus] torques group	101	6	4	10	2	18	15	15	18	4	4	0	0	3	1	1
33	Blautia	Blautia	Blautia	Bacteria; Firmicutes; Clostridia; Lachnospirales; Lachnospiraceae; Blautia	492	44	28	38	26	93	40	79	78	21	31	11	0	3	0	0
34	Coprococcus	Coprococcus	Coprococcus	Bacteria; Firmicutes; Clostridia; Lachnospirales; Lachnospiraceae; Coprococcus	125	4	11	6	2	32	6	25	21	7	5	3	1	2	0	0
35	Fusicatenibacter	Fusicatenibacter	Fusicatenibacter	Bacteria; Firmicutes; Clostridia; Lachnospirales; Lachnospiraceae; Fusicatenibacter	176	12	10	17	6	30	12	23	29	8	16	10	0	2	1	0
36	Lachnoclostridium	Lachnoclostridium	Lachnoclostridium	Bacteria; Firmicutes; Clostridia; Lachnospirales; Lachnospiraceae; Lachnoclostridium	104	7	4	7	8	12	4	22	12	11	9	6	0	0	0	0
37	Lachnospiraceae NK4A136 group	Lachnospiraceae NK4A136 group	Other	Bacteria; Firmicutes; Clostridia; Lachnospirales; Lachnospiraceae; Lachnospiraceae NK4A136 group	148	5	6	11	11	30	8	30	24	9	8	5	0	1	0	0
38	Roseburia	Roseburia	Roseburia	Bacteria; Firmicutes; Clostridia; Lachnospirales; Lachnospiraceae; Roseburia	175	14	14	7	10	33	6	33	26	11	9	11	0	1	0	0
39	Uncultured-39	Uncultured-39	Other	Bacteria; Firmicutes; Clostridia; Lachnospirales; Lachnospiraceae; Uncultured	168	9	15	10	8	16	21	23	30	13	14	4	0	1	0	4
40	{Unknown Genus} [Eubacterium] coprostanoligenes group	{Unknown Genus} [Eubacterium] coprostanoligenes group	Eubacterium	Bacteria; Firmicutes; Clostridia; Oscillospirales; [Eubacterium] coprostanoligenes group;	232	12	5	9	6	24	5	17	12	10	9	5	0	34	1	71
41	Saccharofermentans	Saccharofermentans	Saccharofermentans	Bacteria; Firmicutes; Clostridia; Oscillospirales; Hungateiclostridiaceae; Saccharofermentans	129	10	9	6	8	6	6	6	11	6	22	11	0	0	0	28
42	UCG-002	UCG-002	Other	Bacteria; Firmicutes; Clostridia; Oscillospirales; Oscillospiraceae; UCG-002	123	5	7	11	8	31	11	16	20	2	2	9	0	0	0	0
43	Faecalibacterium	Faecalibacterium	Faecalibacterium	Bacteria; Firmicutes; Clostridia; Oscillospirales; Ruminococcaceae; Faecalibacterium	1047	54	75	92	40	166	78	183	146	62	67	30	0	26	0	28
44	Ruminococcus	Ruminococcus	Ruminococcus	Bacteria; Firmicutes; Clostridia; Oscillospirales; Ruminococcaceae; Ruminococcus	621	38	38	38	27	102	51	118	82	49	46	26	0	6	0	0
45	Subdoligranulum	Subdoligranulum	Subdoligranulum	Bacteria; Firmicutes; Clostridia; Oscillospirales; Ruminococcaceae; Subdoligranulum	308	26	25	22	15	70	16	47	38	20	16	10	0	2	0	1
46	Romboutsia	Romboutsia	Romboutsia	Bacteria; Firmicutes; Clostridia; Peptostreptococcales-Tissierellales; Peptostreptococcaceae; Romboutsia	217	6	5	9	4	13	10	12	2	4	5	4	0	47	0	87
47	Dialister	Dialister	Dialister	Bacteria; Firmicutes; Negativicutes; Veillonellales-Selenomonadales; Veillonellaceae; Dialister	119	7	7	12	10	17	10	12	20	8	12	1	0	3	0	0
48	Hypnocyclicus	Hypnocyclicus	Hypnocyclicus	Bacteria; Fusobacteriota; Fusobacteriia; Fusobacteriales; Leptotrichiaceae; Hypnocyclicus	158	12	20	4	7	16	27	26	23	7	11	3	0	1	0	1
49	Methylobacterium-Methylorubrum	Methylobacterium-Methylorubrum	Methylobacterium-Methylorubrum	Bacteria; Proteobacteria; Alphaproteobacteria; Rhizobiales; Beijerinckiaceae; Methylobacterium-Methylorubrum	201	0	0	0	0	0	0	0	0	0	0	0	0	0	0	199
50	Allorhizobium-Neorhizobium-Pararhizobium-Rhizobium	Allorhizobium-Neorhizobium-Pararhizobium-Rhizobium	Allorhizobium-Neorhizobium-Pararhizobium-Rhizobium	Bacteria; Proteobacteria; Alphaproteobacteria; Rhizobiales; Rhizobiaceae; Allorhizobium-Neorhizobium-Pararhizobium-Rhizobium	511	4	2	1	3	3	9	4	2	6	2	3	0	4	0	0
51	Paracoccus	Paracoccus	Paracoccus	Bacteria; Proteobacteria; Alphaproteobacteria; Rhodobacterales; Rhodobacteraceae; Paracoccus	228	4	2	3	13	11	10	5	13	10	12	7	0	10	0	59
52	Sphingomonas	Sphingomonas	Sphingomonas	Bacteria; Proteobacteria; Alphaproteobacteria; Sphingomonadales; Sphingomonadaceae; Sphingomonas	252	0	0	2	0	0	0	1	0	0	1	0	0	0	0	11
53	Aquaspirillum	Aquaspirillum	Aquaspirillum	Bacteria; Proteobacteria; Gammaproteobacteria; Burkholderiales; Aquaspirillaceae; Aquaspirillum	206	12	21	18	18	14	28	9	28	25	23	10	0	0	0	0
54	Rivicola	Rivicola	Rivicola	Bacteria; Proteobacteria; Gammaproteobacteria; Burkholderiales; Aquaspirillaceae; Rivicola	172	12	24	10	6	21	3	38	4	26	23	4	0	1	0	0
55	Comamonas	Comamonas	Comamonas	Bacteria; Proteobacteria; Gammaproteobacteria; Burkholderiales; Comamonadaceae; Comamonas	256	2	13	5	8	7	2	12	17	11	11	10	0	4	0	0
56	Delftia	Delftia	Delftia	Bacteria; Proteobacteria; Gammaproteobacteria; Burkholderiales; Comamonadaceae; Delftia	512	0	0	0	0	0	0	0	0	0	0	0	154	101	172	0
57	Massilia	Massilia	Massilia	Bacteria; Proteobacteria; Gammaproteobacteria; Burkholderiales; Oxalobacteraceae; Massilia	234	0	0	0	0	0	0	0	0	0	0	0	0	0	0	1
58	Dechloromonas	Dechloromonas	Dechloromonas	Bacteria; Proteobacteria; Gammaproteobacteria; Burkholderiales; Rhodocyclaceae; Dechloromonas	270	17	25	14	31	11	8	18	35	53	25	14	0	1	0	18
59	Thauera	Thauera	Thauera	Bacteria; Proteobacteria; Gammaproteobacteria; Burkholderiales; Rhodocyclaceae; Thauera	224	9	14	17	29	13	9	20	20	30	41	21	0	1	0	0
60	Zoogloea	Zoogloea	Zoogloea	Bacteria; Proteobacteria; Gammaproteobacteria; Burkholderiales; Rhodocyclaceae; Zoogloea	334	10	7	11	35	19	10	32	36	52	82	39	0	1	0	0
61	Sutterella	Sutterella	Sutterella	Bacteria; Proteobacteria; Gammaproteobacteria; Burkholderiales; Sutterellaceae; Sutterella	112	8	4	7	9	19	0	27	10	10	12	5	0	1	0	0
62	Aeromonas	Aeromonas	Aeromonas	Bacteria; Proteobacteria; Gammaproteobacteria; Enterobacterales; Aeromonadaceae; Aeromonas	3093	223	376	363	321	193	91	293	550	361	205	81	1	13	3	19
63	Tolumonas	Tolumonas	Tolumonas	Bacteria; Proteobacteria; Gammaproteobacteria; Enterobacterales; Aeromonadaceae; Tolumonas	523	48	34	48	38	48	56	65	72	61	35	17	0	1	0	0
64	Rheinheimera	Rheinheimera	Rheinheimera	Bacteria; Proteobacteria; Gammaproteobacteria; Enterobacterales; Alteromonadaceae; Rheinheimera	510	44	108	77	65	46	42	29	66	26	3	3	0	1	0	0
65	Citrobacter	Citrobacter	Citrobacter	Bacteria; Proteobacteria; Gammaproteobacteria; Enterobacterales; Enterobacteriaceae; Citrobacter	165	4	6	5	2	9	5	5	5	3	9	1	0	2	0	40
66	Enterobacter	Enterobacter	Enterobacter	Bacteria; Proteobacteria; Gammaproteobacteria; Enterobacterales; Enterobacteriaceae; Enterobacter	795	2	5	4	2	2	2	5	8	6	3	1	1	0	0	679
67	Escherichia-Shigella	Escherichia-Shigella	Escherichia-Shigella	Bacteria; Proteobacteria; Gammaproteobacteria; Enterobacterales; Enterobacteriaceae; Escherichia-Shigella	374	22	34	45	33	32	2	39	76	38	29	8	0	4	2	10
68	Klebsiella	Klebsiella	Klebsiella	Bacteria; Proteobacteria; Gammaproteobacteria; Enterobacterales; Enterobacteriaceae; Klebsiella	3110	4	1	7	5	7	6	3	9	4	5	4	0	0	0	2235
69	Kluyvera	Kluyvera	Kluyvera	Bacteria; Proteobacteria; Gammaproteobacteria; Enterobacterales; Enterobacteriaceae; Kluyvera	116	4	6	4	5	4	6	3	9	6	3	0	0	0	0	2
70	Erwinia	Erwinia	Erwinia	Bacteria; Proteobacteria; Gammaproteobacteria; Enterobacterales; Erwiniaceae; Erwinia	234	0	0	0	0	0	0	0	0	0	0	0	0	0	0	4
71	Shewanella	Shewanella	Shewanella	Bacteria; Proteobacteria; Gammaproteobacteria; Enterobacterales; Shewanellaceae; Shewanella	144	12	37	38	25	1	2	12	10	0	5	0	0	2	0	0
72	Succinivibrio	Succinivibrio	Succinivibrio	Bacteria; Proteobacteria; Gammaproteobacteria; Enterobacterales; Succinivibrionaceae; Succinivibrio	150	12	9	8	18	27	10	18	19	7	13	7	0	1	0	0
73	Cellvibrio	Cellvibrio	Cellvibrio	Bacteria; Proteobacteria; Gammaproteobacteria; Pseudomonadales; Cellvibrionaceae; Cellvibrio	103	2	7	3	4	3	12	7	2	0	2	3	0	0	0	10
74	Acinetobacter	Acinetobacter	Acinetobacter	Bacteria; Proteobacteria; Gammaproteobacteria; Pseudomonadales; Moraxellaceae; Acinetobacter	17274	1079	2066	1622	1863	1323	1672	1259	2616	1336	1116	429	11	188	14	256
75	Enhydrobacter	Enhydrobacter	Enhydrobacter	Bacteria; Proteobacteria; Gammaproteobacteria; Pseudomonadales; Moraxellaceae; Enhydrobacter	1157	99	67	49	130	84	4	163	222	143	98	44	0	1	2	1
77	Pseudomonas	Pseudomonas	Pseudomonas	Bacteria; Proteobacteria; Gammaproteobacteria; Pseudomonadales; Pseudomonadaceae; Pseudomonas	2160	138	249	245	275	85	68	117	198	155	115	44	0	18	4	370
78	Thiothrix	Thiothrix	Thiothrix	Bacteria; Proteobacteria; Gammaproteobacteria; Thiotrichales; Thiotrichaceae; Thiothrix	234	36	30	33	51	14	6	10	20	18	14	2	0	0	0	0
79	Stenotrophomonas	Stenotrophomonas	Stenotrophomonas	Bacteria; Proteobacteria; Gammaproteobacteria; Xanthomonadales; Xanthomonadaceae; Stenotrophomonas	12689	3	16	7	12	5	9	7	14	11	6	9	2896	2601	4126	0
